# Supplementary material
Source: Springer Nature journal article supplement (https://www.springermedizin.de/resource/supplementary/12974_2010_278_MOESM4_ESM.pdf/9601148)

Cell Volume ( $\mu\text{l}/\text{mg}$  Protein)

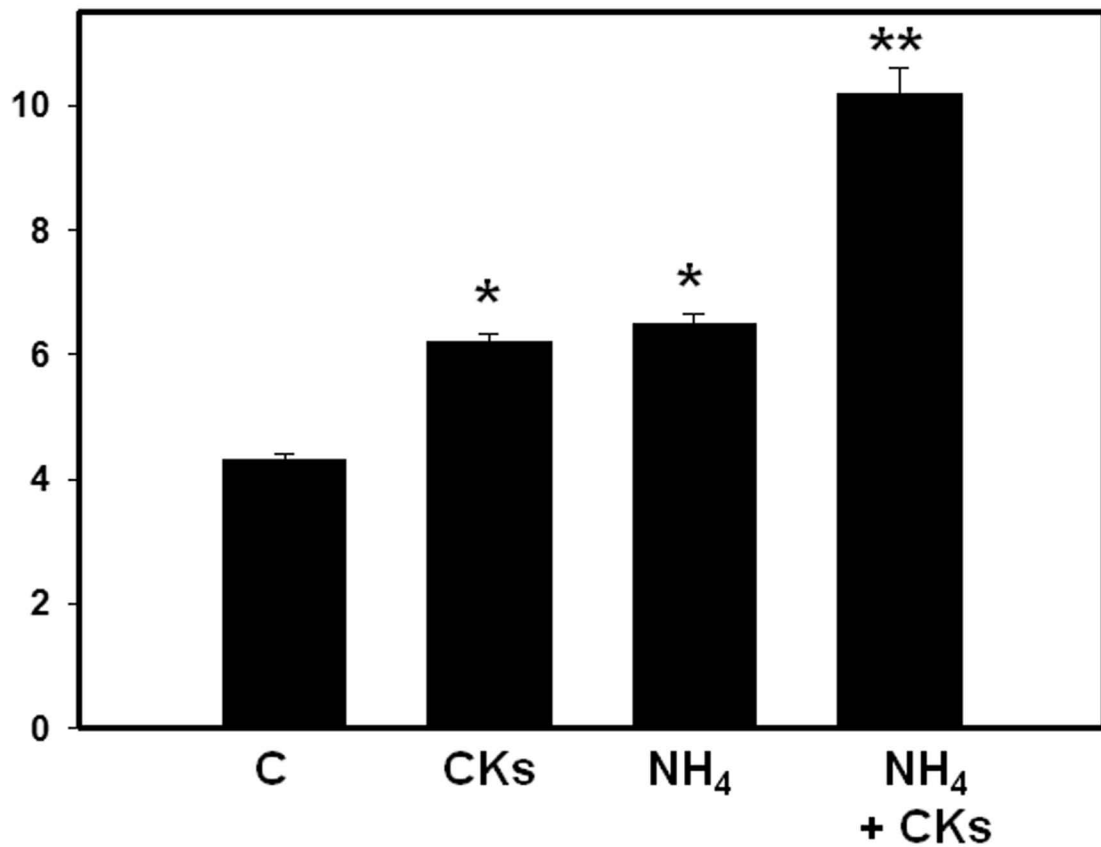

Supplement: MOESM4 [file 9601148]
